# Supplementary material
Source: Frontiers journal article supplement (https://www.frontiersin.org/articles/508577)
Supplement: Table_1.pdf [file Table_1.pdf]

## Appendix-1

### Stroke Aphasic Depression Questionnaire in Hospital-10th version(SADQ-H10)

INSTRUCTION: Please indicate on how many days out of the last 7 the patient has shown the following behaviours:

|                                                                                           |         |                                                                        |         |
|-------------------------------------------------------------------------------------------|---------|------------------------------------------------------------------------|---------|
| <b>1. Did he / she have weeping spells?</b>                                               |         | <b>6. Did he / she get angry?</b>                                      |         |
| no                                                                                        | score 0 | no                                                                     | score 0 |
| 1 to 3 days                                                                               | score 1 | 1 to 3 days                                                            | score 1 |
| 4 to 6 days                                                                               | score 2 | 4 to 6 days                                                            | score 2 |
| every day                                                                                 | score 3 | every day                                                              | score 3 |
| <b>2. Did he / she often have restless or have difficulty in falling asleep at night?</b> |         | <b>7. Was he / she unwilling to participate in social activities?</b>  |         |
| no                                                                                        | score 0 | no                                                                     | score 0 |
| 1 to 3 days                                                                               | score 1 | 1 to 3 days                                                            | score 1 |
| 4 to 6 days                                                                               | score 2 | 4 to 6 days                                                            | score 2 |
| every day                                                                                 | score 3 | every day                                                              | score 3 |
| <b>3. Did he / she avoid eye contact when you spoke to him / her?</b>                     |         | <b>8. Did he / she sit without doing anything?</b>                     |         |
| no                                                                                        | score 0 | no                                                                     | score 0 |
| 1 to 3 days                                                                               | score 1 | 1 to 3 days                                                            | score 1 |
| 4 to 6 days                                                                               | score 2 | 4 to 6 days                                                            | score 2 |
| every day                                                                                 | score 3 | every day                                                              | score 3 |
| <b>4. Did he / she burst into tears or lose control suddenly?</b>                         |         | <b>9. Did he / she keep himself / herself occupied during the day?</b> |         |
| no                                                                                        | score 0 | no                                                                     | score 0 |

|                                                               |         |                                                   |         |
|---------------------------------------------------------------|---------|---------------------------------------------------|---------|
| 1 to 3 days                                                   | score 1 | 1 to 3 days                                       | score 1 |
| 4 to 6 days                                                   | score 2 | 4 to 6 days                                       | score 2 |
| every day                                                     | score 3 | every day                                         | score 3 |
| <b>5. Did he/she indicate suffering from aches and pains?</b> |         | <b>10. Did he / she get restless and fidgety?</b> |         |
| no                                                            | score 0 | no                                                | score 0 |
| 1 to 3 days                                                   | score 1 | 1 to 3 days                                       | score 1 |
| 4 to 6 days                                                   | score 2 | 4 to 6 days                                       | score 2 |
| every day                                                     | score 3 | every day                                         | score 3 |

Total score: \_\_\_\_\_
