# Supplementary material
Source: Frontiers journal article supplement (https://www.frontiersin.org/articles/508577)
Supplement: Table_2.pdf [file Table_2.pdf]

## Appendix-2

### Loewenstein Occupational Therapy Cognitive Assessment (LOTCA)

| DOMAINS                              | ITEMS                                         | SCORE RANGE | SCORES |
|--------------------------------------|-----------------------------------------------|-------------|--------|
| Orientation                          | 1. orientation to place                       | 1 to 8      |        |
|                                      | 2. orientation to time                        | 1 to 8      |        |
| Visual Perception<br>(VP)            | 3. object identification                      | 1 to 4      |        |
|                                      | 4. shape identification                       | 1 to 4      |        |
|                                      | 5. overlapping figures                        | 1 to 4      |        |
|                                      | 6. object constancy                           | 1 to 4      |        |
| Spatial Perception<br>(SP)           | 7. directions on client's body                | 1 to 4      |        |
|                                      | 8. spatial relations                          | 1 to 4      |        |
|                                      | 9. spatial relations in pictures              | 1 to 4      |        |
| Motor Praxis (MP)                    | 10. motor imitation                           | 1 to 4      |        |
|                                      | 11. utilization of objects                    | 1 to 4      |        |
|                                      | 12. symbolic actions                          | 1 to 4      |        |
| Visuo-motor<br>Organization<br>(VMO) | 13. copying geometric forms                   | 1 to 4      |        |
|                                      | 14. reproduction of<br>two-dimensional models | 1 to 4      |        |
|                                      | 15. pegboard construction                     | 1 to 4      |        |
|                                      | 16. colored block designs                     | 1 to 4      |        |
|                                      | 17. plain block designs                       | 1 to 4      |        |
|                                      | 18. reproduction of a puzzle                  | 1 to 4      |        |
|                                      | 19. drawing a clock                           | 1 to 4      |        |

|                                |                                              |        |  |
|--------------------------------|----------------------------------------------|--------|--|
| Thinking<br>Operations (TO)    | 20. pictorial classification                 | 1 to 5 |  |
|                                | 21. Riska unstructured object classification | 1 to 5 |  |
|                                | 22. Riska structured object classification   | 1 to 5 |  |
|                                | 23. pictorial sequencing A                   | 1 to 4 |  |
|                                | 24. pictorial sequencing B                   | 1 to 4 |  |
|                                | 25. geometrical sequencing                   | 1 to 4 |  |
|                                | 26. logical questions                        | 1 to 4 |  |
| Attention and<br>Concentration |                                              | 1 to 4 |  |

Total score: \_\_\_\_\_
